# Supplementary material
Source: PubMed Central journal article supplement (PMC4634334)
Supplement: ncomms9608-s1.pdf [file ncomms9608-s1.pdf]

# Supplementary Figure 1

**a**

Uninfected lymph node

HIV + lymph node

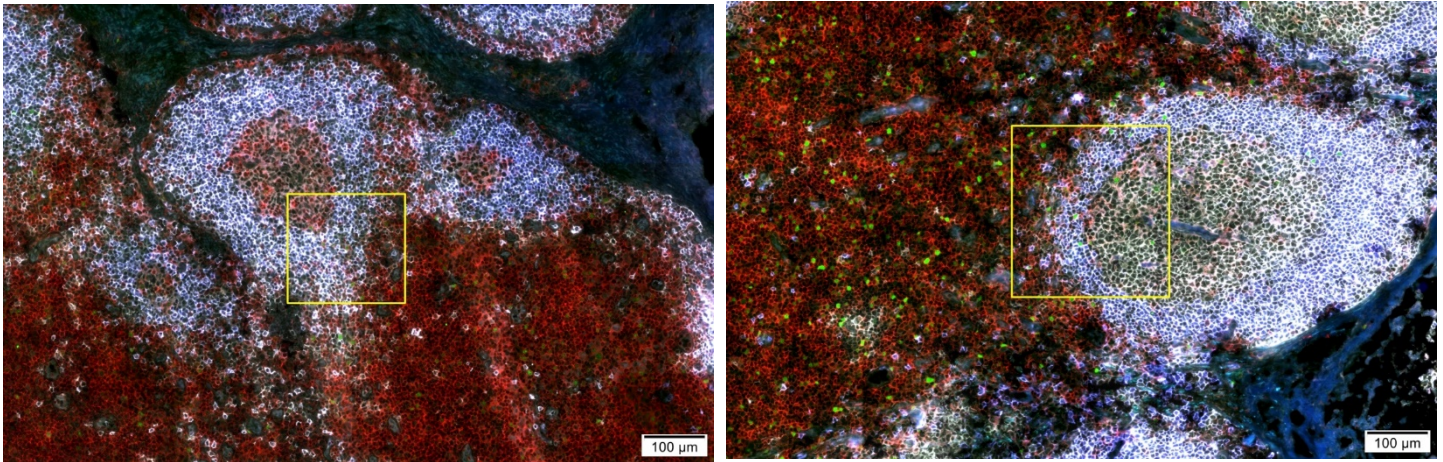

CD20/IgD/Foxp3/CD4

**b**

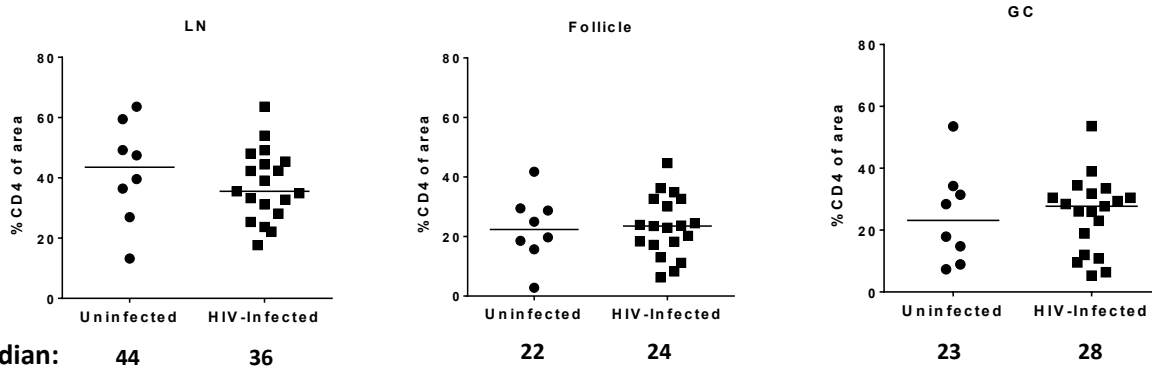

**c**

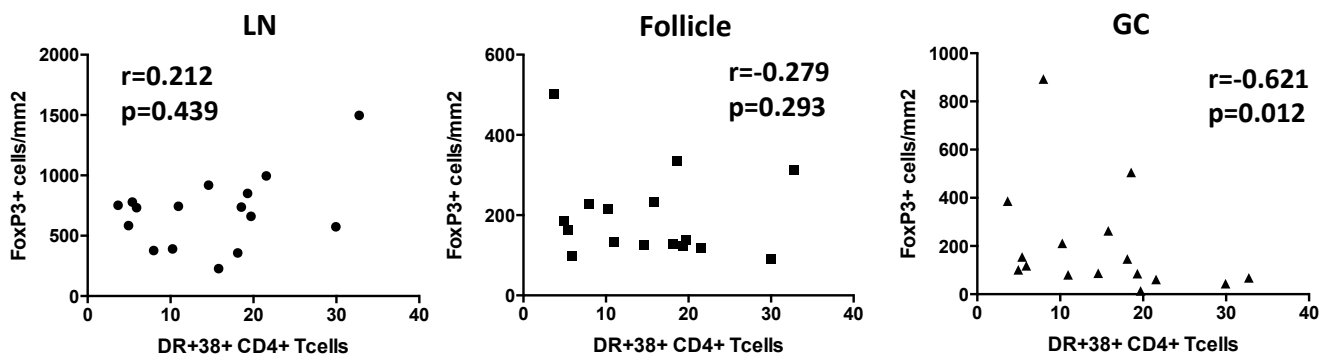

**Supplementary Figure 1. Analyses of immunofluorescently stained human lymph nodes.** (a) Representative immunofluorescent images of lymph nodes from an HIV uninfected and an HIV-infected individual. Lymph nodes were stained for CD20 (white), IgD (blue), Foxp3 (green), and CD4 (red). Yellow squares represent zoomed in images shown in Fig. 1a. Scale bars equal 100  $\mu$ M. (b) The area of each region that stained as CD4<sup>+</sup> was determined in uninfected (n=8) and HIV-infected (n=17) subjects using immunofluorescent staining shown in Fig. 1a. No significant changes between uninfected and HIV-infected individuals were detected. (c) The number of Foxp3<sup>+</sup> cells per area were correlated to the number of CD38<sup>+</sup>HLA-DR<sup>+</sup> cells for total, follicular, and germinal center lymph node regions. Statistical analyses were performed by Spearman correlation tests (c) to compare unpaired, nonparametric samples.

# Supplementary Figure 2

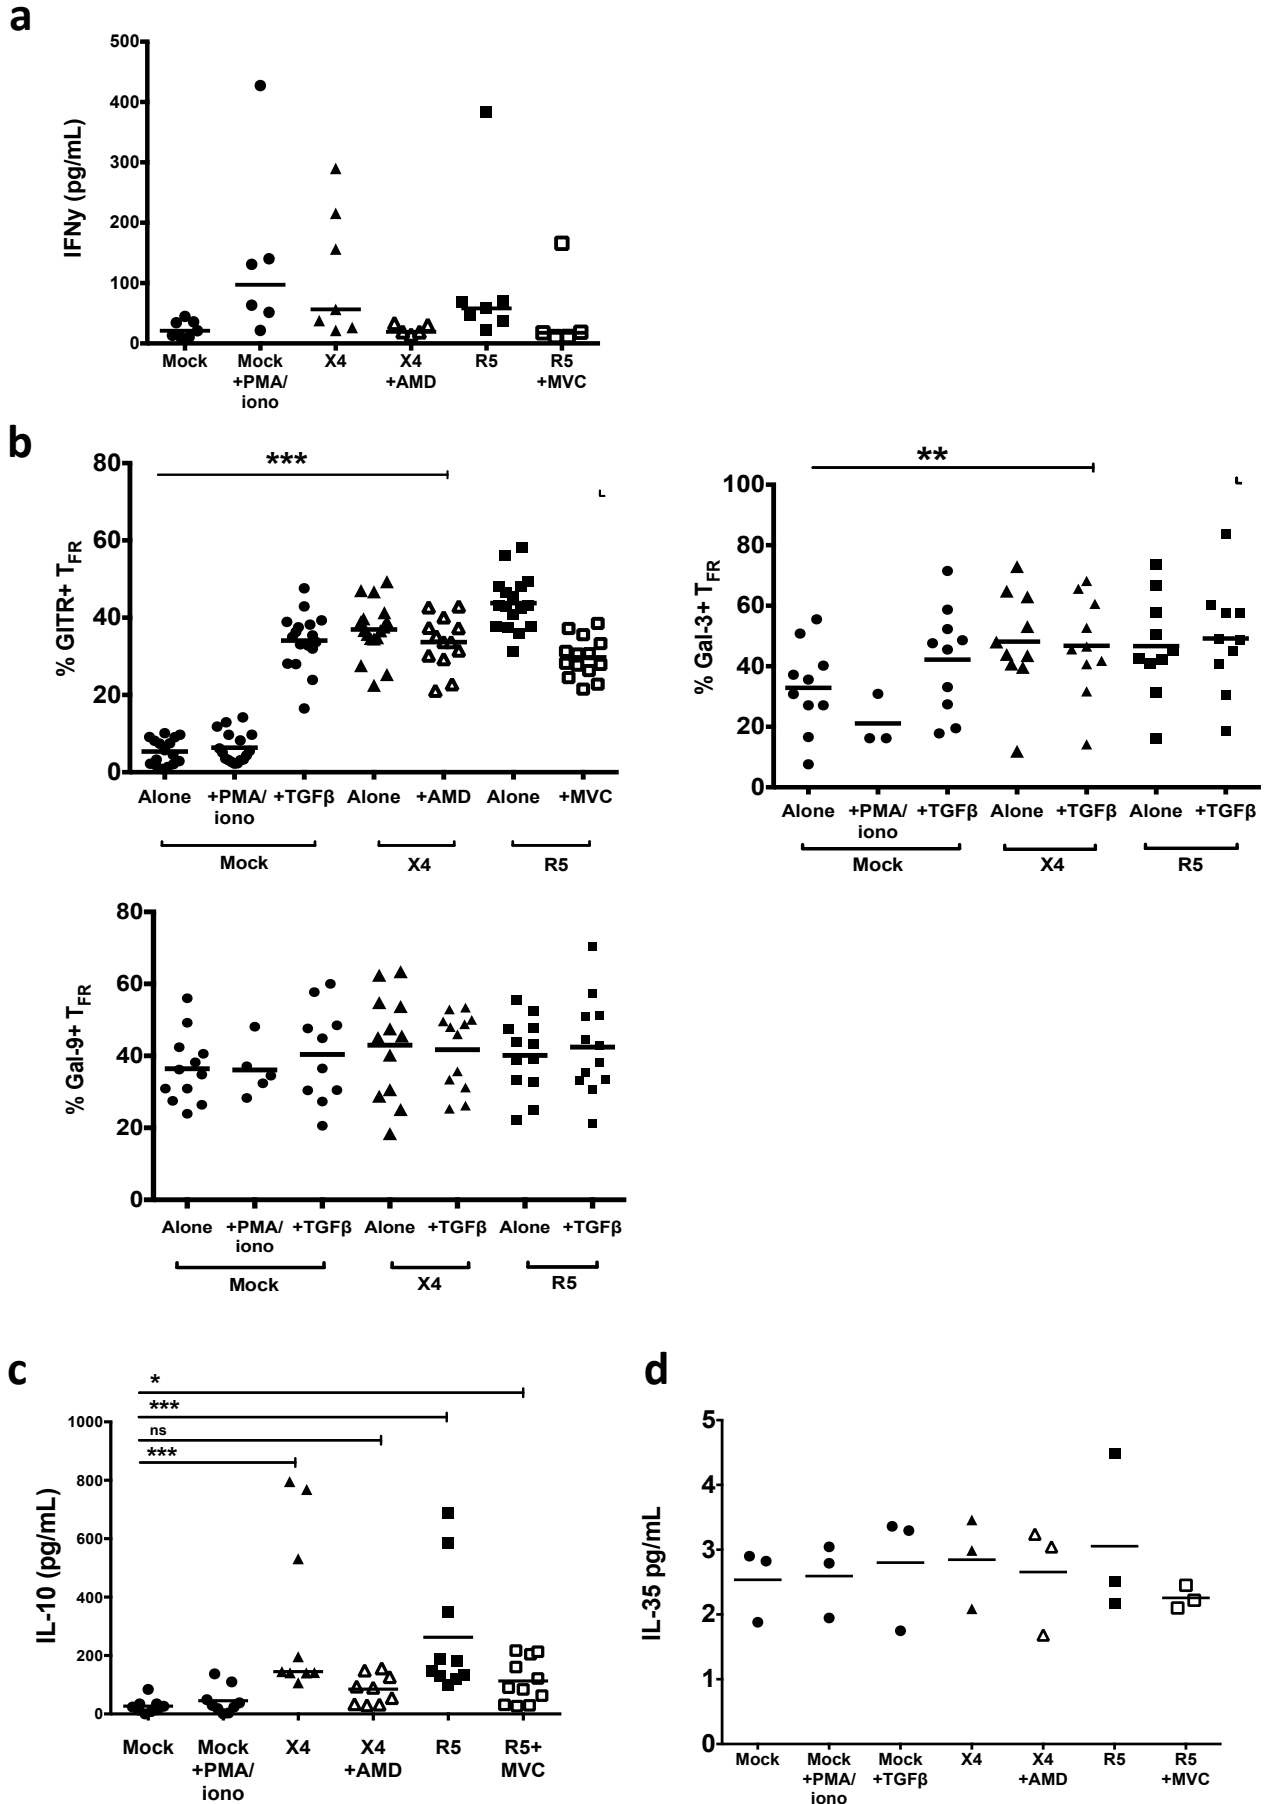

**Supplementary Figure 2. Expression of regulatory molecules by T<sub>FR</sub> in HIV infection *ex vivo*.** Disaggregated tonsil cells were spinoculated and/or treated as indicated and analyzed for cytokine production (a,c, d) in culture or surface inhibitory molecules (b). (a) Culture supernatants were measured for IFN $\gamma$  secretion by ELISA (n=7). (b) Percentages of T<sub>FR</sub> surface expression of GITR (n=15), galectin-3 (n=10), and galectin-9 (n=12). (c) Culture supernatants were measured for IL-10 secretion by ELISA (n=9). (d) Culture supernatants were measured for IL-35 secretion by ELISA (n=3). The horizontal bars of each graph indicate the median value. Statistical analyses were performed by nonparametric Friedman tests and significance is denoted by asterisks where \* = p < 0.05, \*\* = p < 0.01, and \*\*\* = p < 0.001.

# Supplementary Figure 3

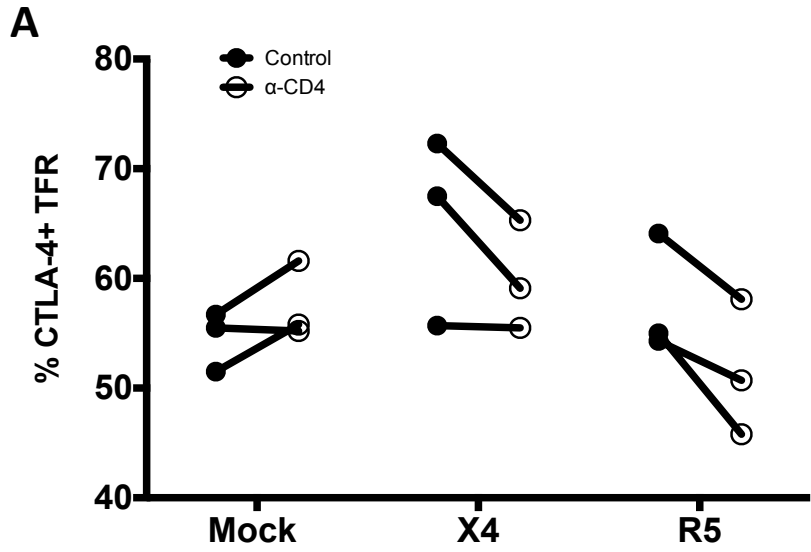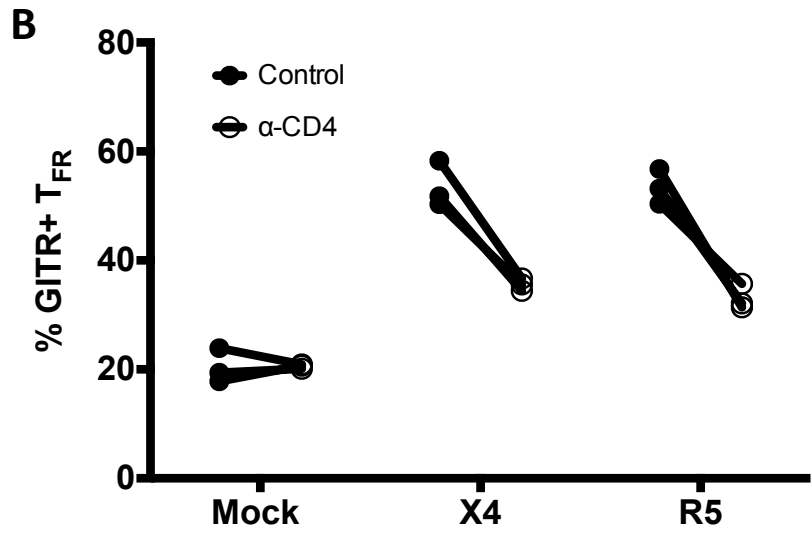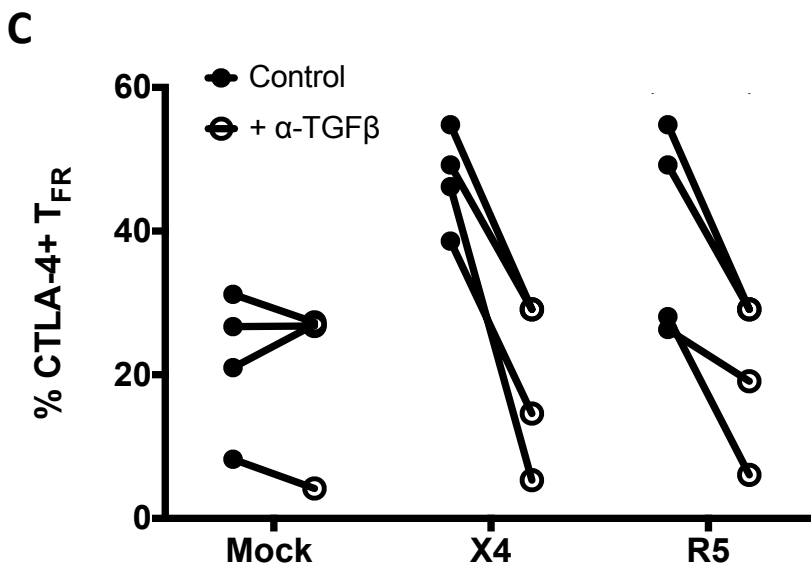

**Supplemental Figure 3. CD4 and TGF $\beta$  signaling promote enhanced T<sub>FR</sub> regulatory phenotype.** Disaggregated tonsil cells were pretreated with a CD4-neutralizing antibody (10 ng/mL) prior to spinoculation to prevent X4- and R5-HIV infection and inhibitory receptors were analyzed after day 2 of culture. (a) Percent of total (surface and intracellular) CTLA-4 expression in T<sub>FR</sub> with and without CD4 blockade (n=3). (b) Percent of GITR expression in T<sub>FR</sub> with and without CD4 blockade (n=3). (c) Tonsil cells were treated with a TGF $\beta$ -neutralizing antibody (2  $\mu$ g/mL) for the duration of culture. Percent of total CTLA-4 expression in T<sub>FR</sub> with or without TGF $\beta$  blockade is shown (n=4).

# Supplementary Figure 4

a

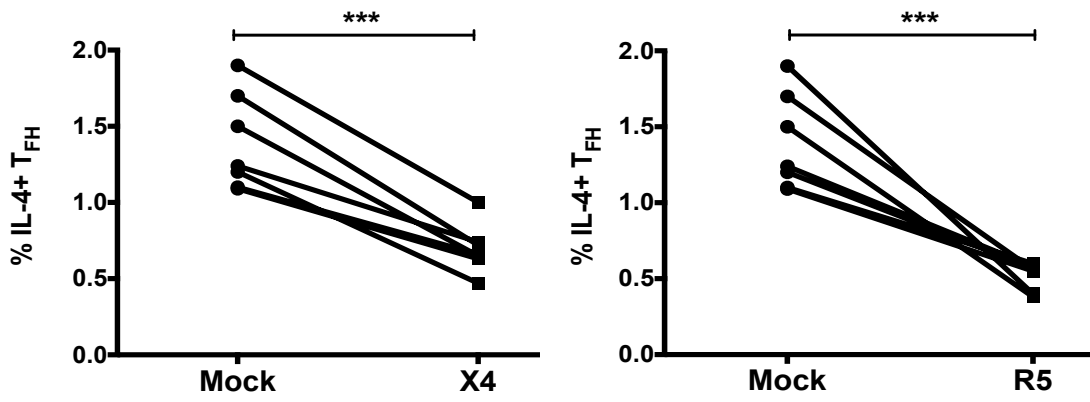

b

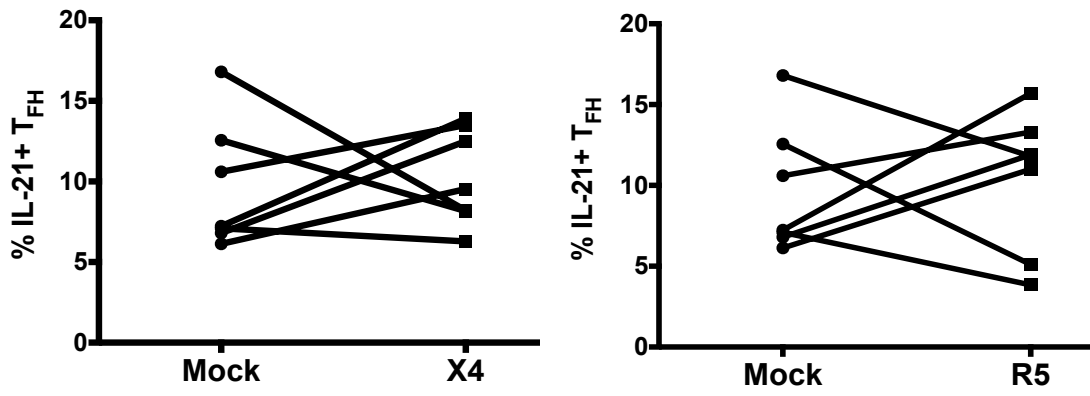

**Supplemental Figure 4. IL-4 and IL-21 production by T<sub>FH</sub> in whole tonsil cultures.** (a) Tonsil cultures were mock-, X4-, or R5-spinoculated and cultured for 2 days. IL-4 production by T<sub>FH</sub> was measured by intracellular cytokine production (n=7). (b) IL-21 was measured by intracellular cytokine production in the same cultures as (a) (n=7).
